# Supplementary material for: Maize root and shoot litter quality controls short-term CO 2 and N 2 O emissions and bacterial community structure of arable soil
Source: Copernicus journal article supplement (doi:10.5194/bg-2019-320), 2019-09-13
Supplement: Supplementary file 1 [file bg-2019-320-supplement.pdf]

Supplementary

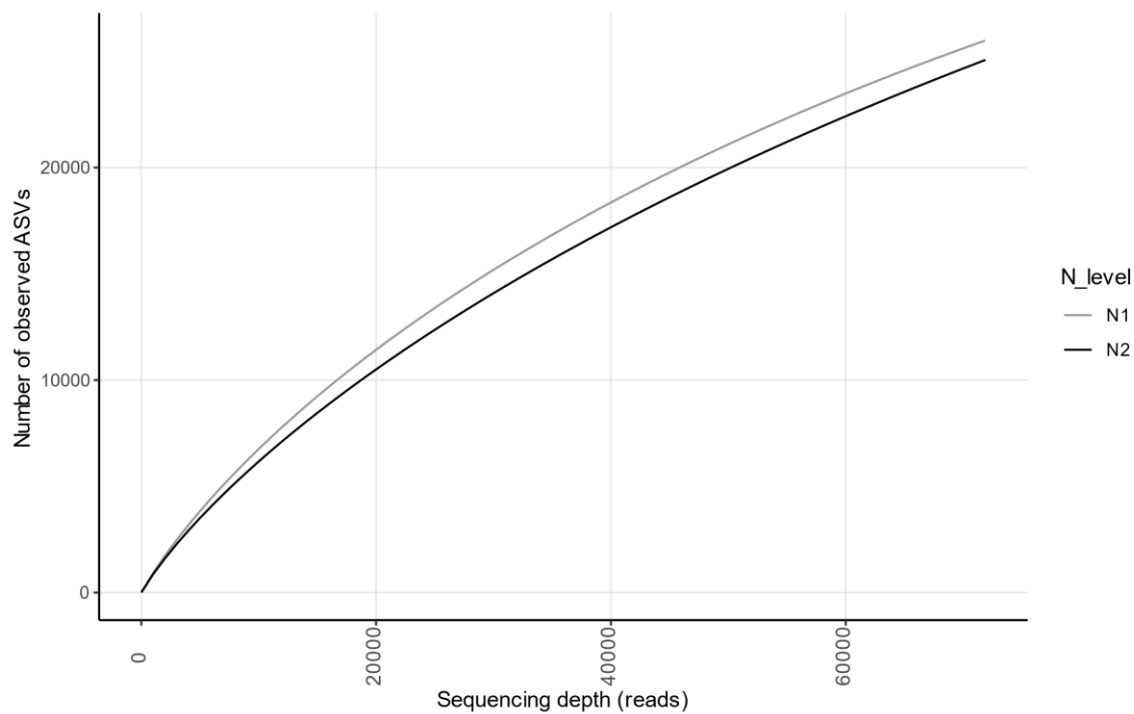

5 **Figure S1: Rarefaction curve of the observed amplicons sequence variants (ASVs) of the soil inhabiting bacterial communities within the two different N-fertilizer treatments (N1 and N2). Samples of the same N treatment were aggregated and rarefied to the same number of raw reads (61206).**

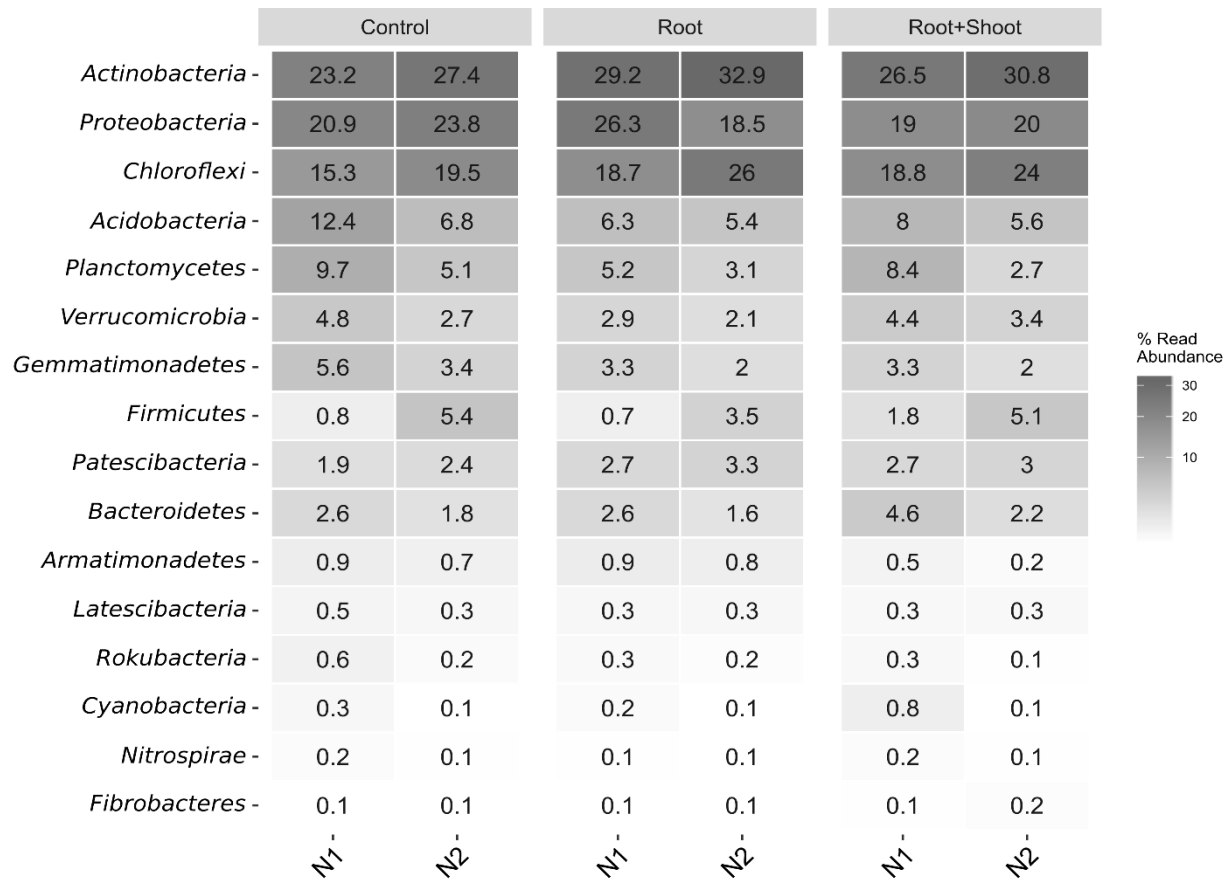

10 **Figure S2: Heatmap of the 16 most abundant phyla (>0.1%) in the analyzed soil samples grouped by N levels and litter input treatments (n=4, except for N2 Root: n=3).**

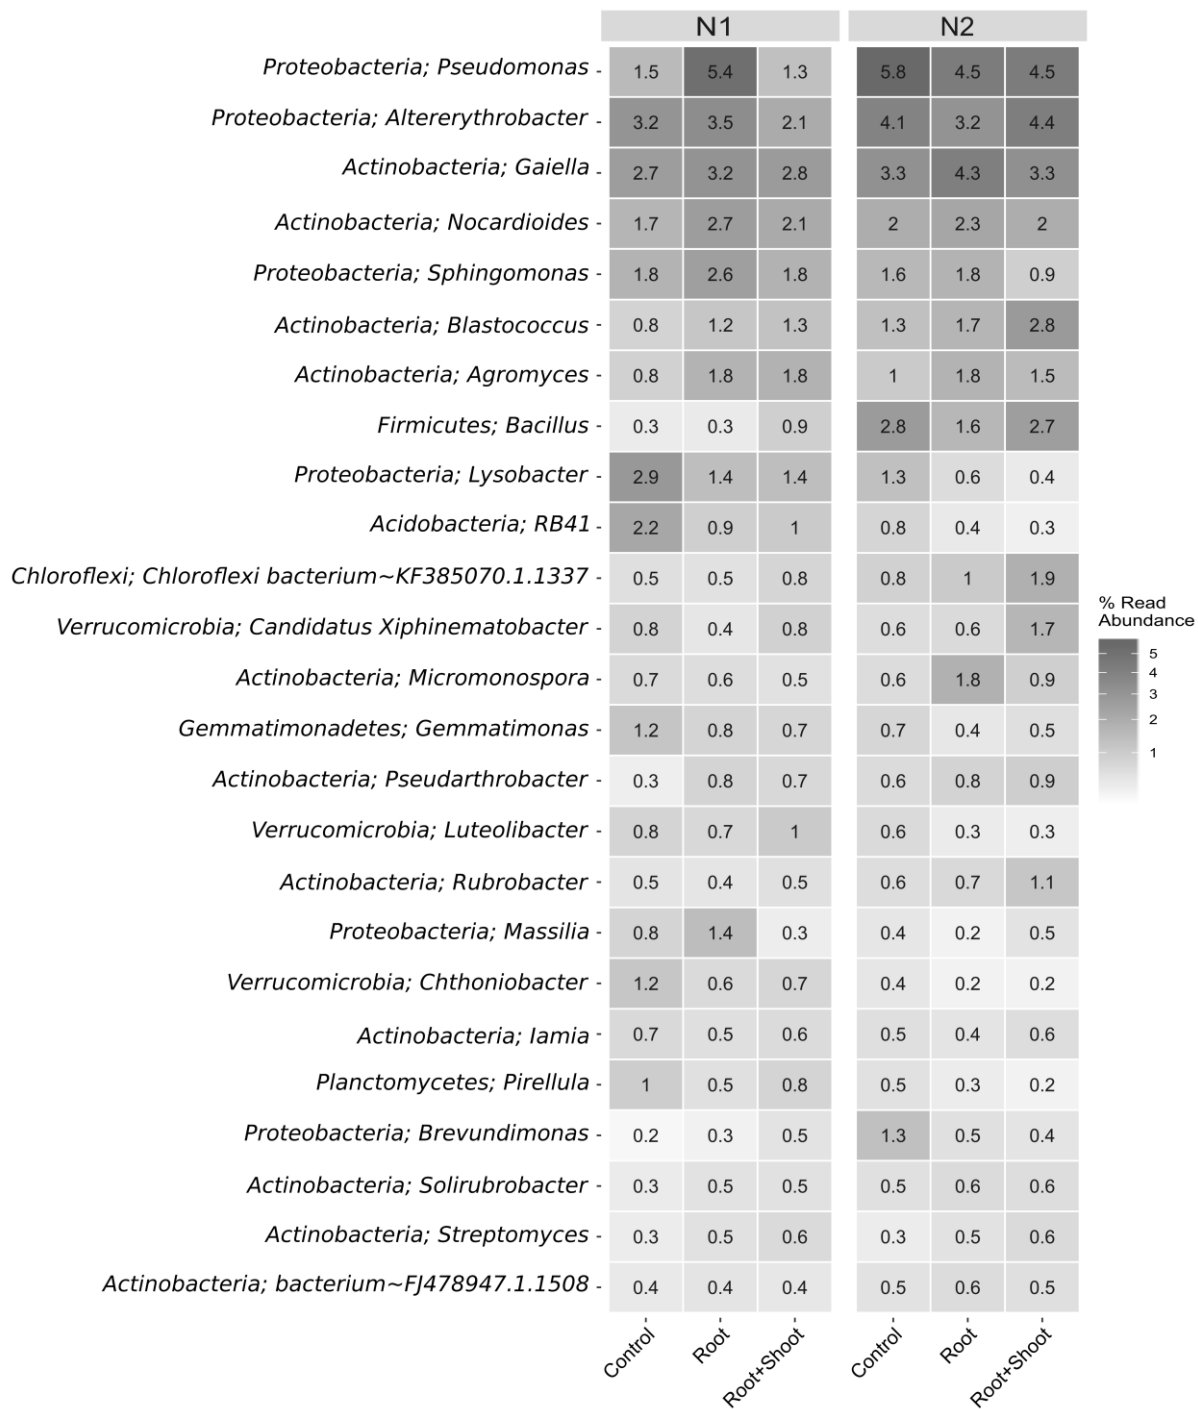

**Figure S3: Heatmap of the 25 most abundant bacterial genera in the analyzed soil samples grouped by N levels and litter input treatments (n=4, except for N2 Root: n=3).**

**Table S4: Sequence summary, alpha diversity indices and PD (phylogenetic diversity) for each treatment. Shown are read sums and mean values of diversity indices.**

| Sample ID | Number of<br>Replicates | Raw Reads | Reads after<br>Pipeline | Reads after<br>Taxonomy filter | Subsample<br>size | Observed<br>ASVs | Shannon | Simpson | PD    |
|-----------|-------------------------|-----------|-------------------------|--------------------------------|-------------------|------------------|---------|---------|-------|
| N1_C      | 4                       | 537242    | 443228                  | 442610                         | 61206             | 21113            | 9.22    | 0.9997  | 423.2 |
| N1_R      | 4                       | 590494    | 492088                  | 491280                         | 61206             | 21447            | 9.10    | 0.9995  | 431.0 |
| N1_RS     | 4                       | 557072    | 439132                  | 438456                         | 61206             | 21789            | 9.29    | 0.9997  | 436.6 |
| N2_C      | 4                       | 531926    | 441286                  | 440968                         | 61206             | 19142            | 8.79    | 0.9992  | 420.4 |
| N2_R      | 3                       | 848974    | 735676                  | 735366                         | 61206             | 18891            | 8.78    | 0.9991  | 409.2 |
| N2_RS     | 4                       | 536532    | 463944                  | 463504                         | 61206             | 20301            | 8.89    | 0.9990  | 403.3 |
